# Supplementary material for: Three-dimensional folding dynamics of the Xenopus tropicalis genome
Source: PubMed Central journal article supplement (PMC8270788; doi:10.1038/s41588-021-00878-z), 2021-06-07

# Fig. 4a

Fig. 4b on next page

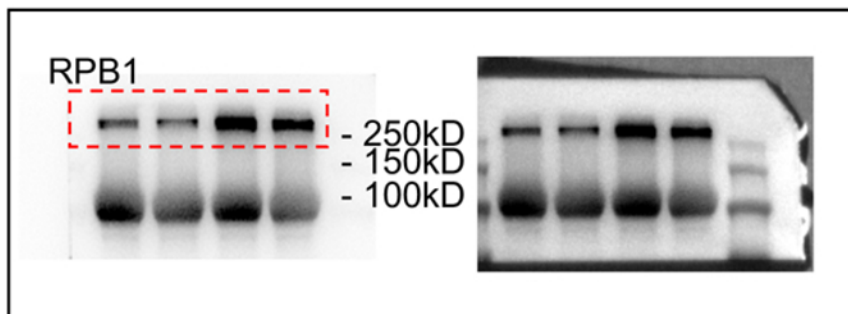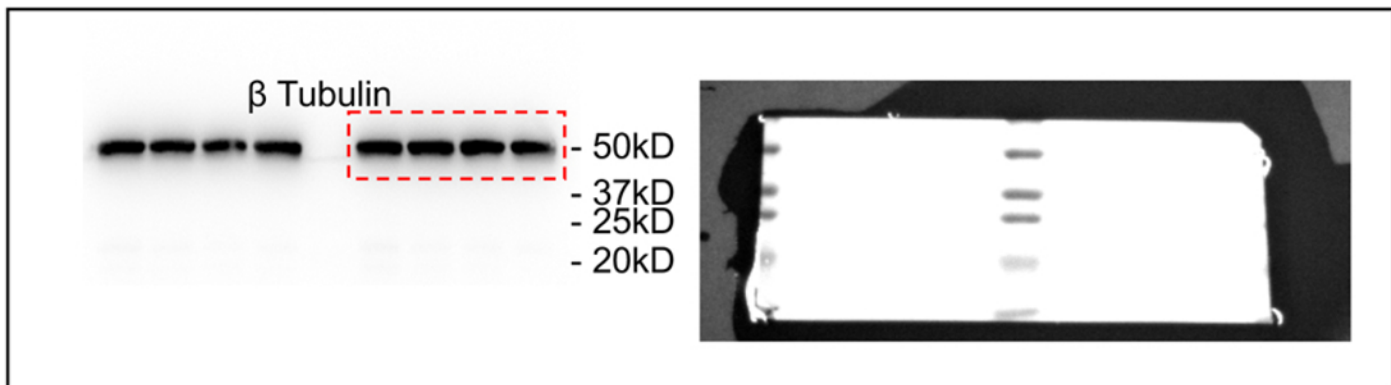

Fig. 4b

Fig. 4c on next page

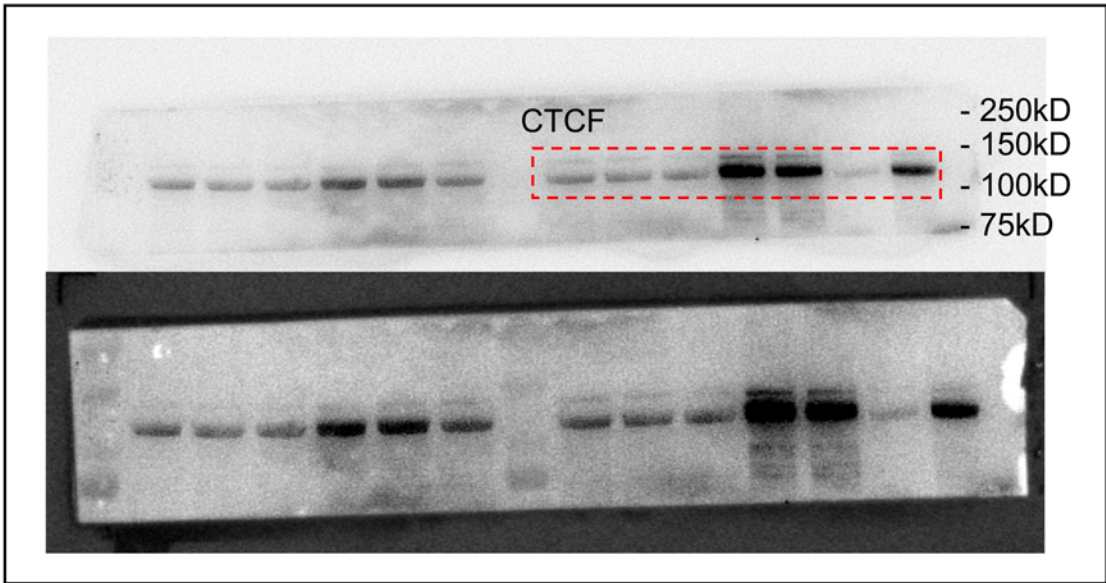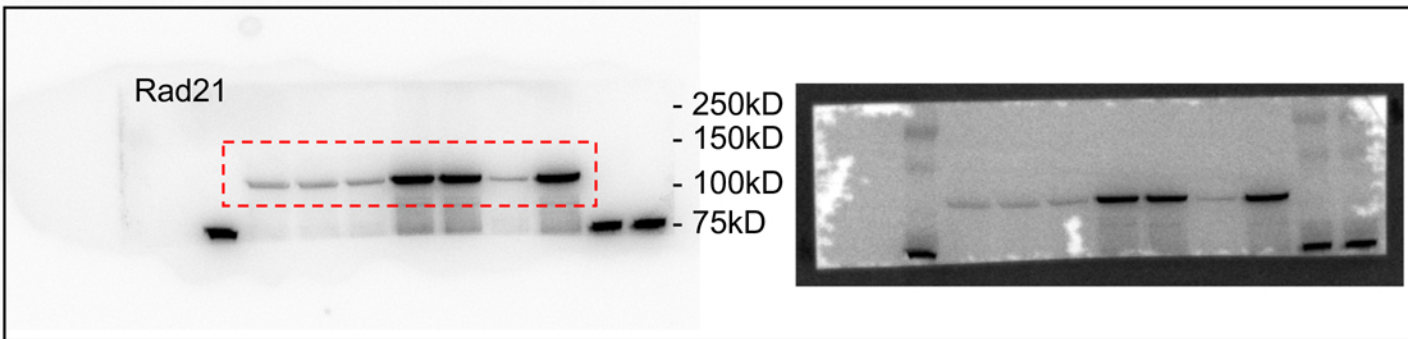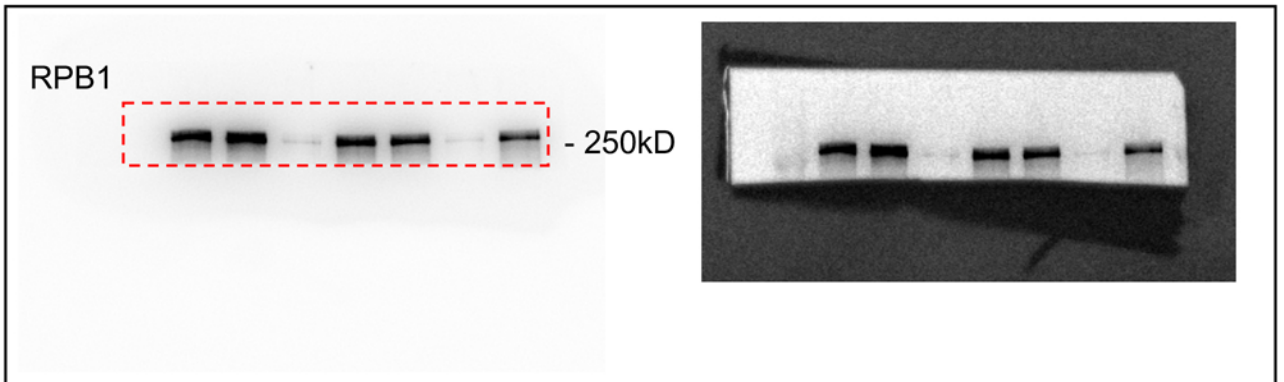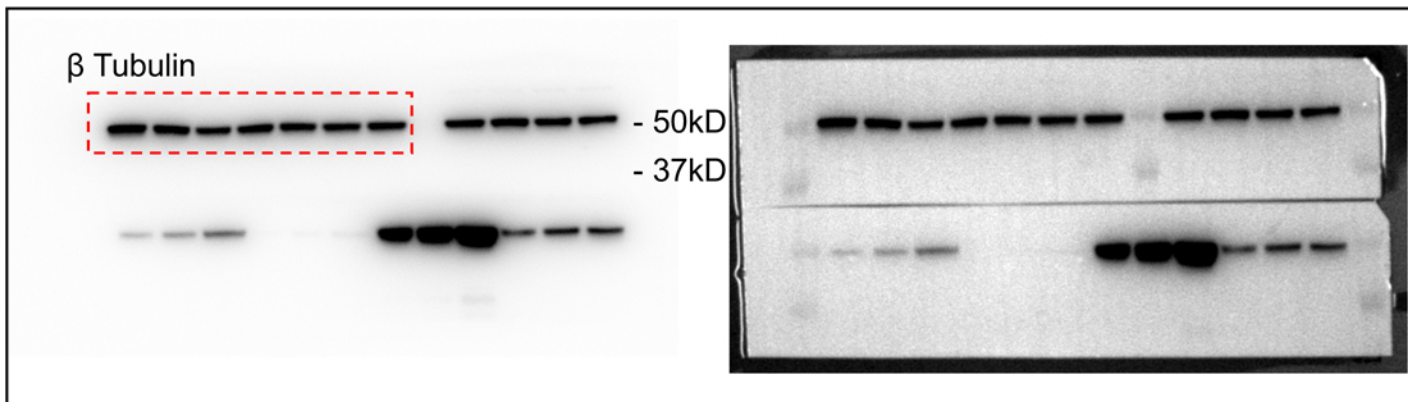

Fig. 4c

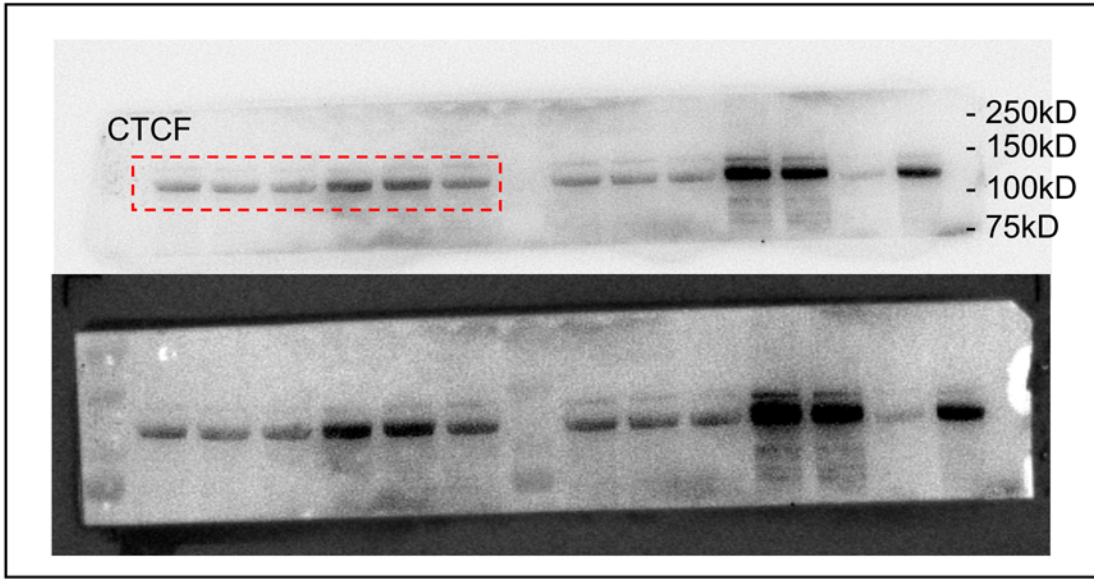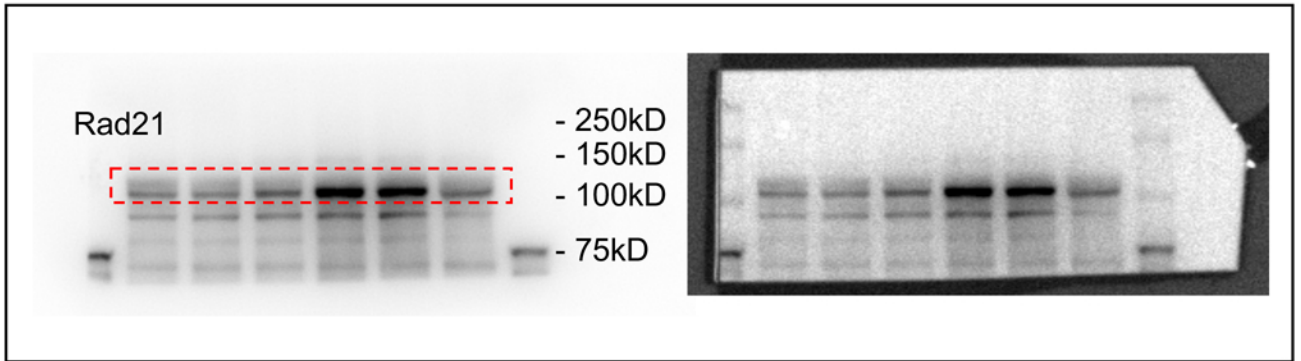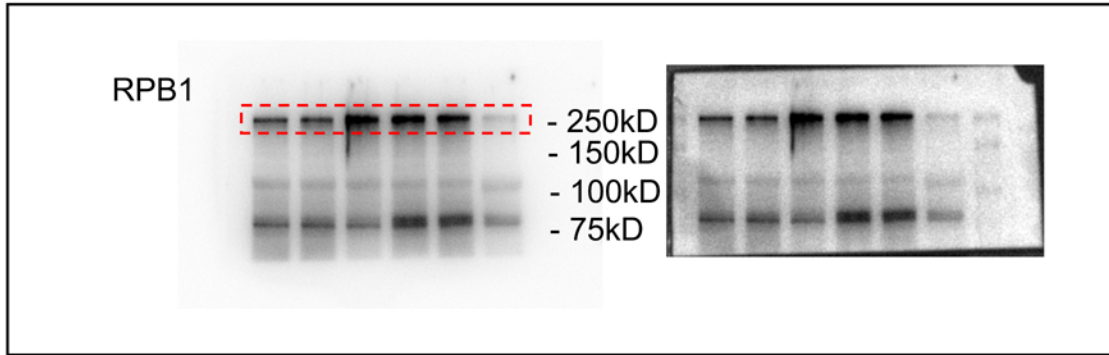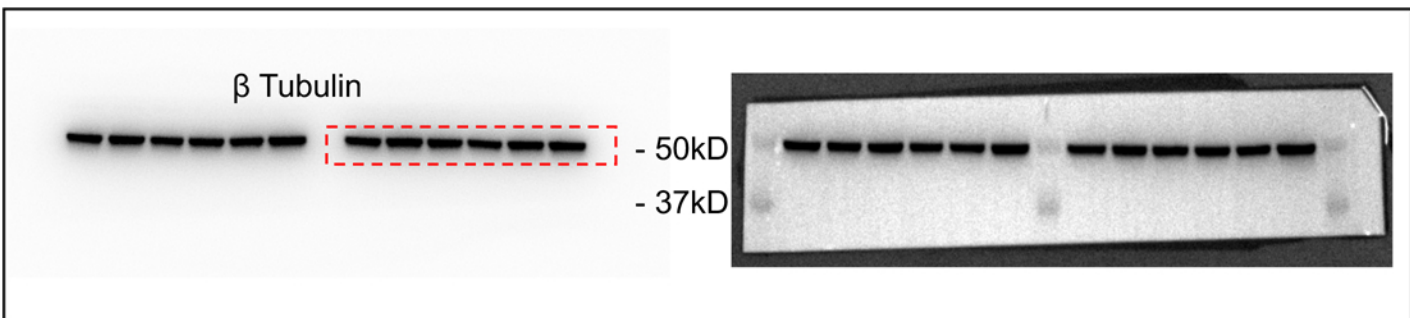

Supplement: 41588_2021_878_MOESM4_ESM.pdf [file 41588_2021_878_MOESM4_ESM.pdf]
