# Supplementary material for: Three-dimensional folding dynamics of the Xenopus tropicalis genome
Source: PubMed Central journal article supplement (PMC8270788; doi:10.1038/s41588-021-00878-z), 2021-06-07

Fig. 6b

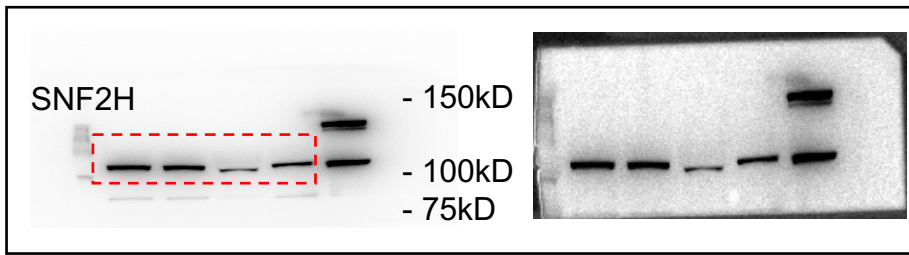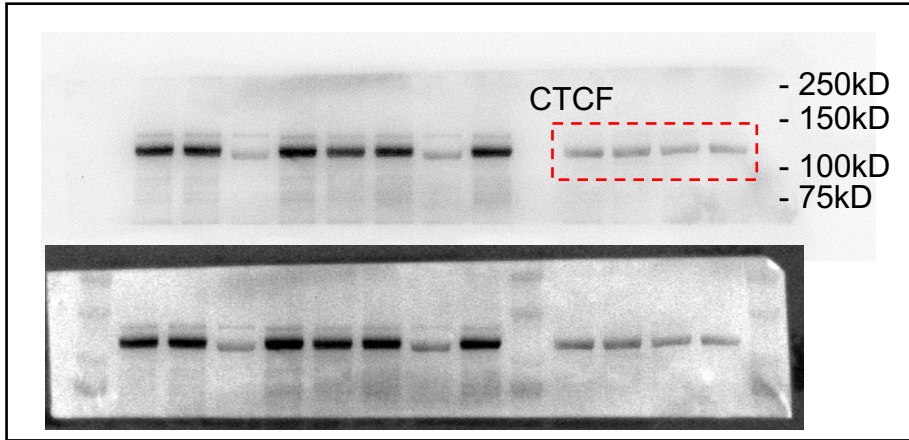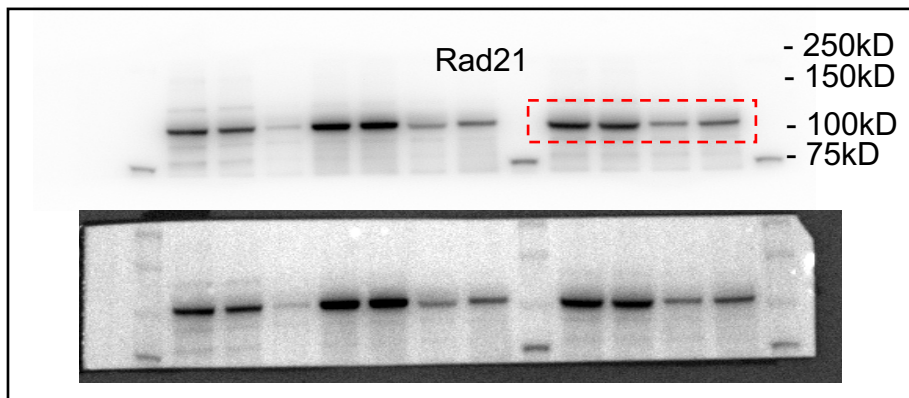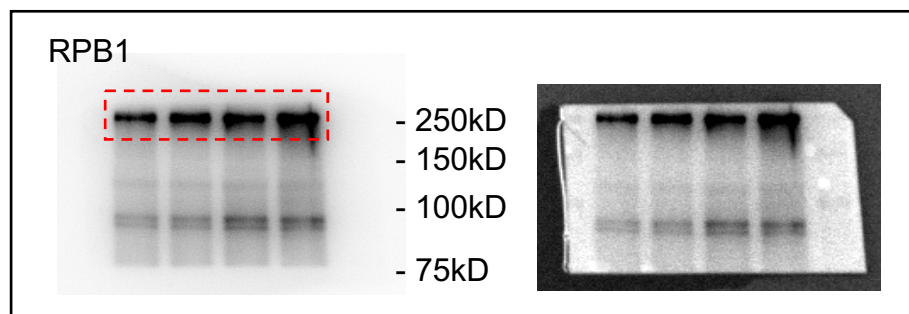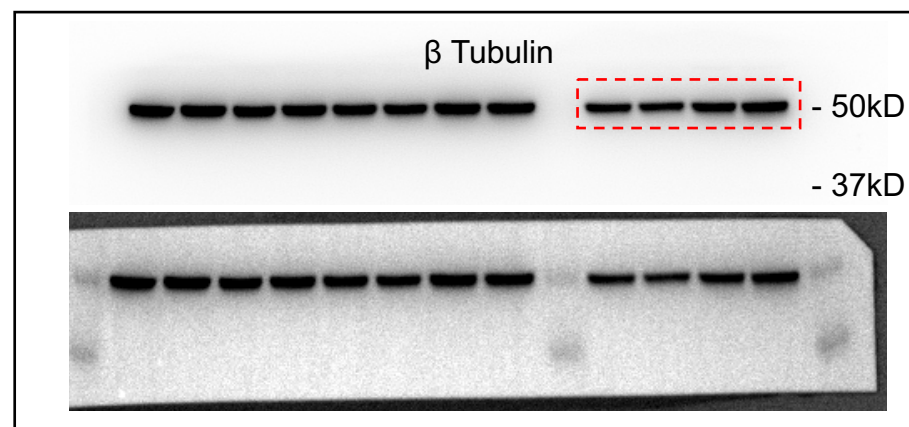

Supplement: 41588_2021_878_MOESM6_ESM.pdf [file 41588_2021_878_MOESM6_ESM.pdf]
